# Supplementary material for: Facile modification of nylon filter via vacuum coating with chitosan@MCM-41/GO for efficient oily wastewater treatment
Source: Royal Society of Chemistry journal article supplement (doi:10.1039/d5ta02462e), 2025-01-01
Supplement: d5ta02462e1.pdf [file d5ta02462e1.pdf]

**Supporting Information**  
**For**  
**Facile Modification of Nylon Filter via Vacuum Coating with Chitosan@MCM-41/GO for**  
**Efficient Oily Wastewater Treatment**

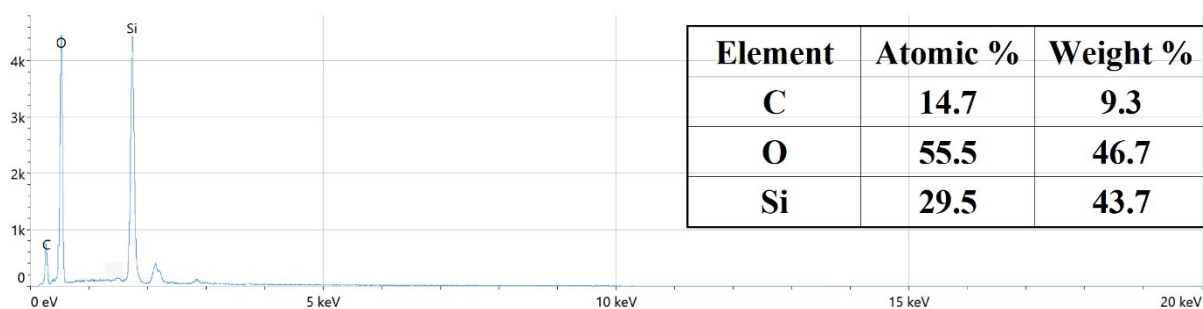

**Figure S1:** Elemental mapping results of MCM-41 prepared by sol gel method.

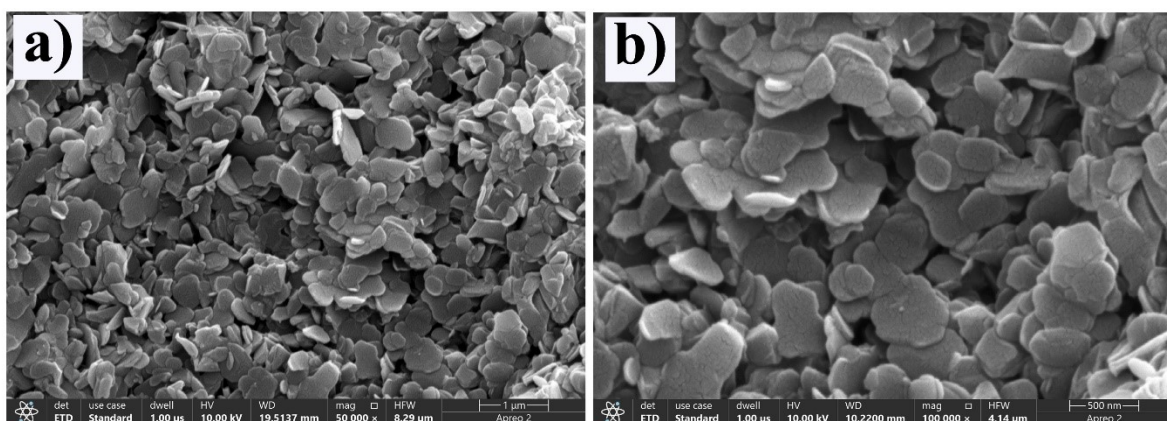

**Figure S2:** SEM image of the GO at low and high magnification synthesized by the modified Humors method.

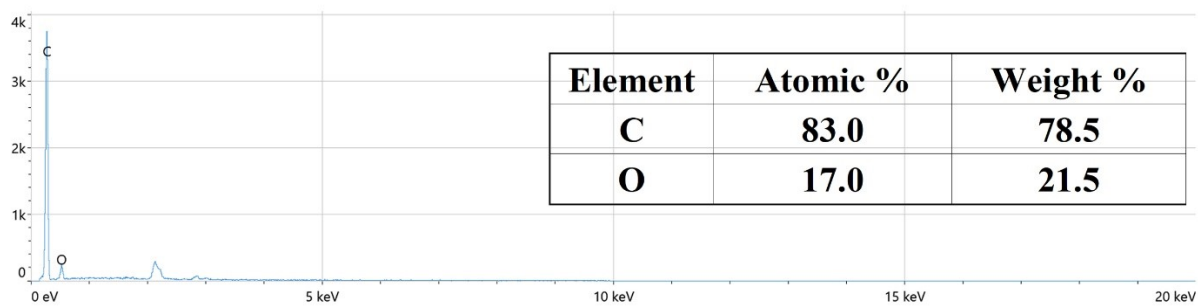

**Figure S3:** Chemical composition results of GO.

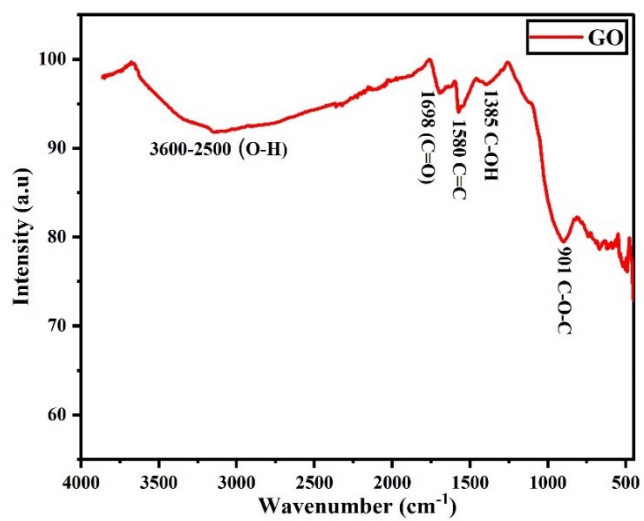

**Figure S4:** FTIR spectrum of GO.

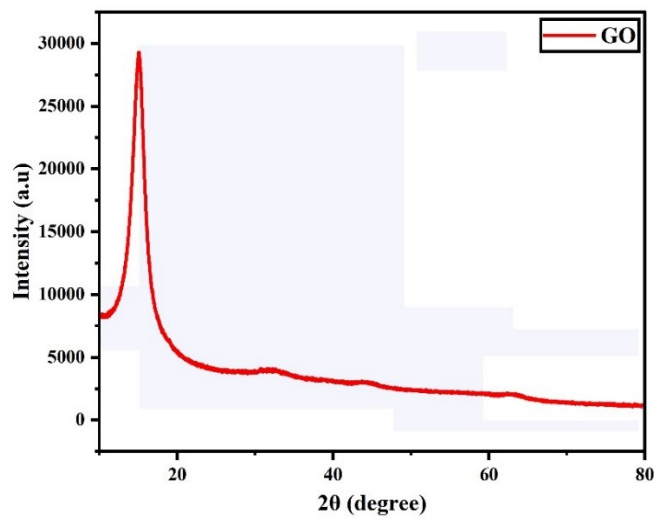

**Figure S5:** XRD results of synthesized GO.

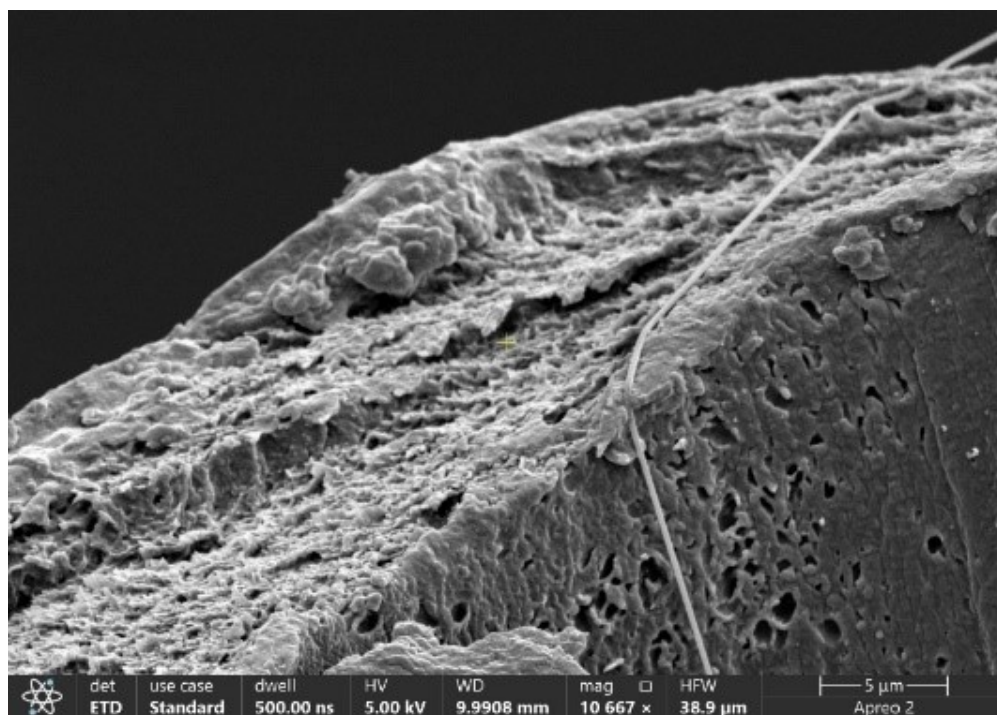

**Figure S6:** SEM images of cross-sectional area of 2-CH@MCM-41/GO-NF.

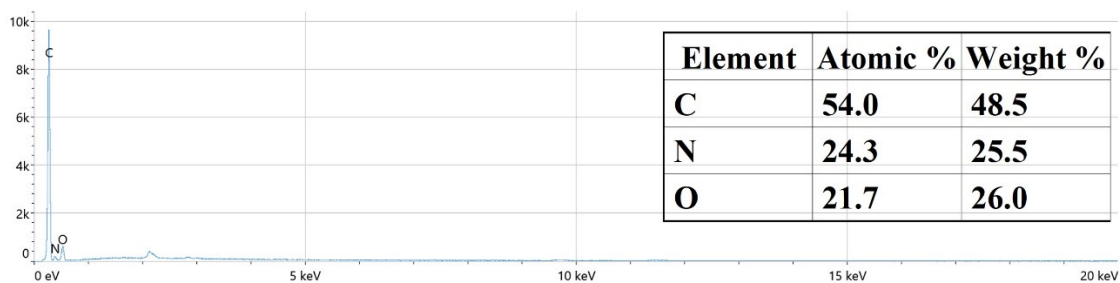

**Figure S7:** EDX results of pristine NF.

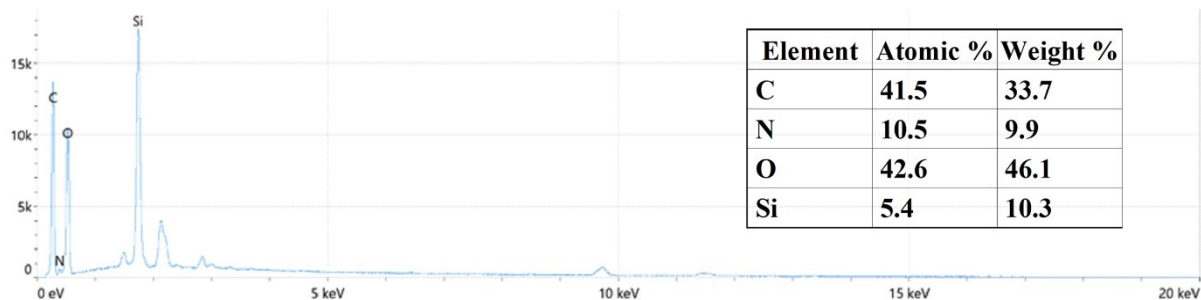

**Figure S8:** Chemical composition spectrum of 2-CH@MCM-41/GO-NF

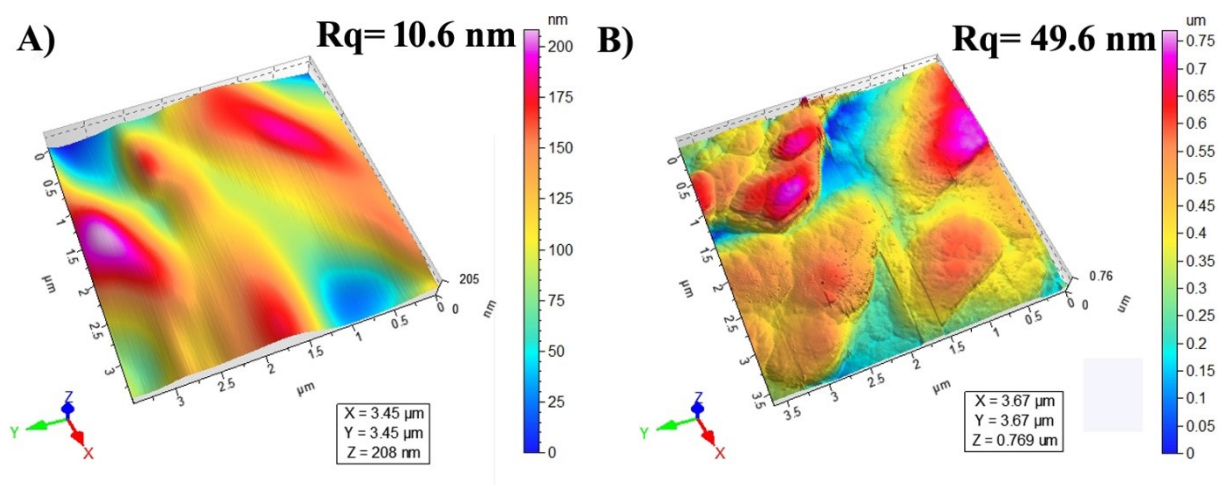

**Figure S9:** AFM images of (A) pristine NF and CH@MCM-41/GO-NF.

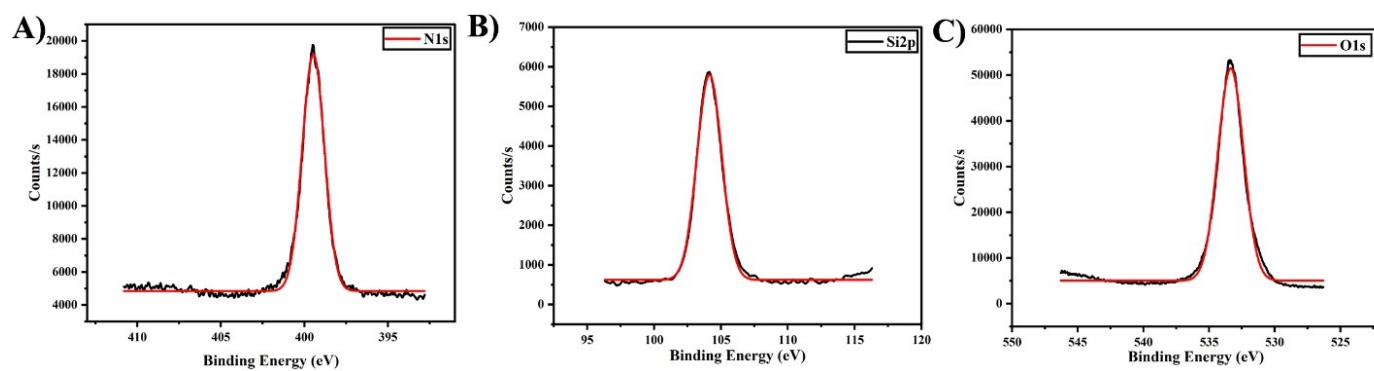

**Figure S10:** Deconvolution XPS spectrum of N1s, Si2p, and O1s.

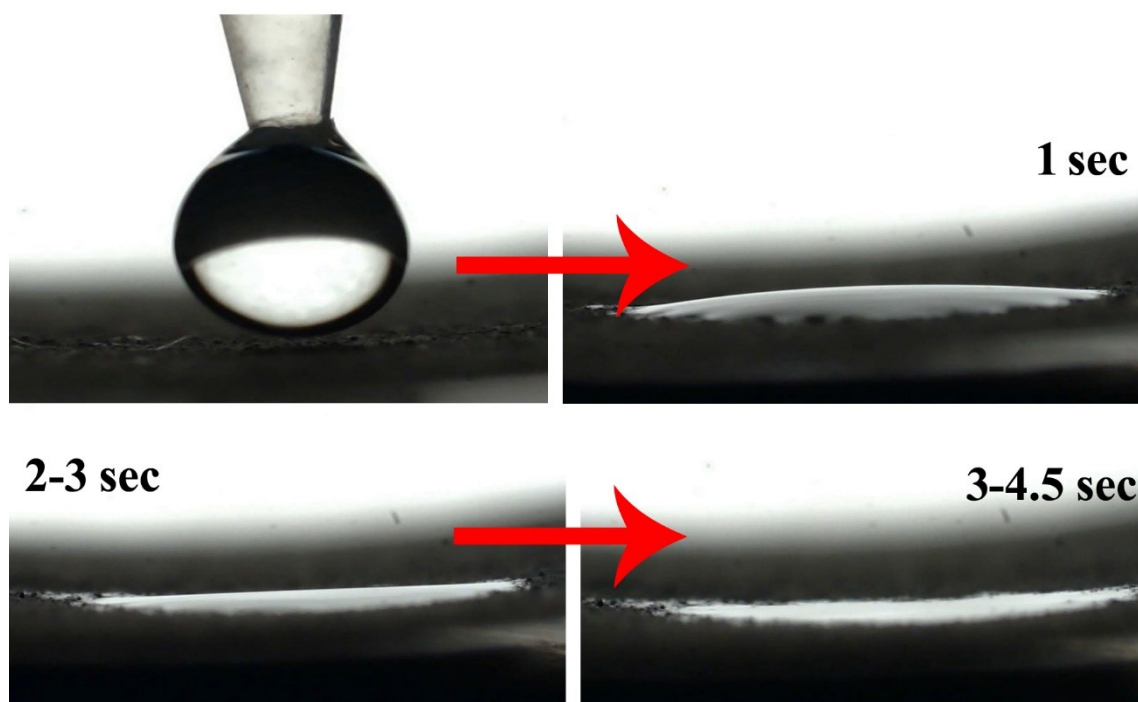

**Figure S11:** Behavior of water droplet over selected modified NF with respect to time.

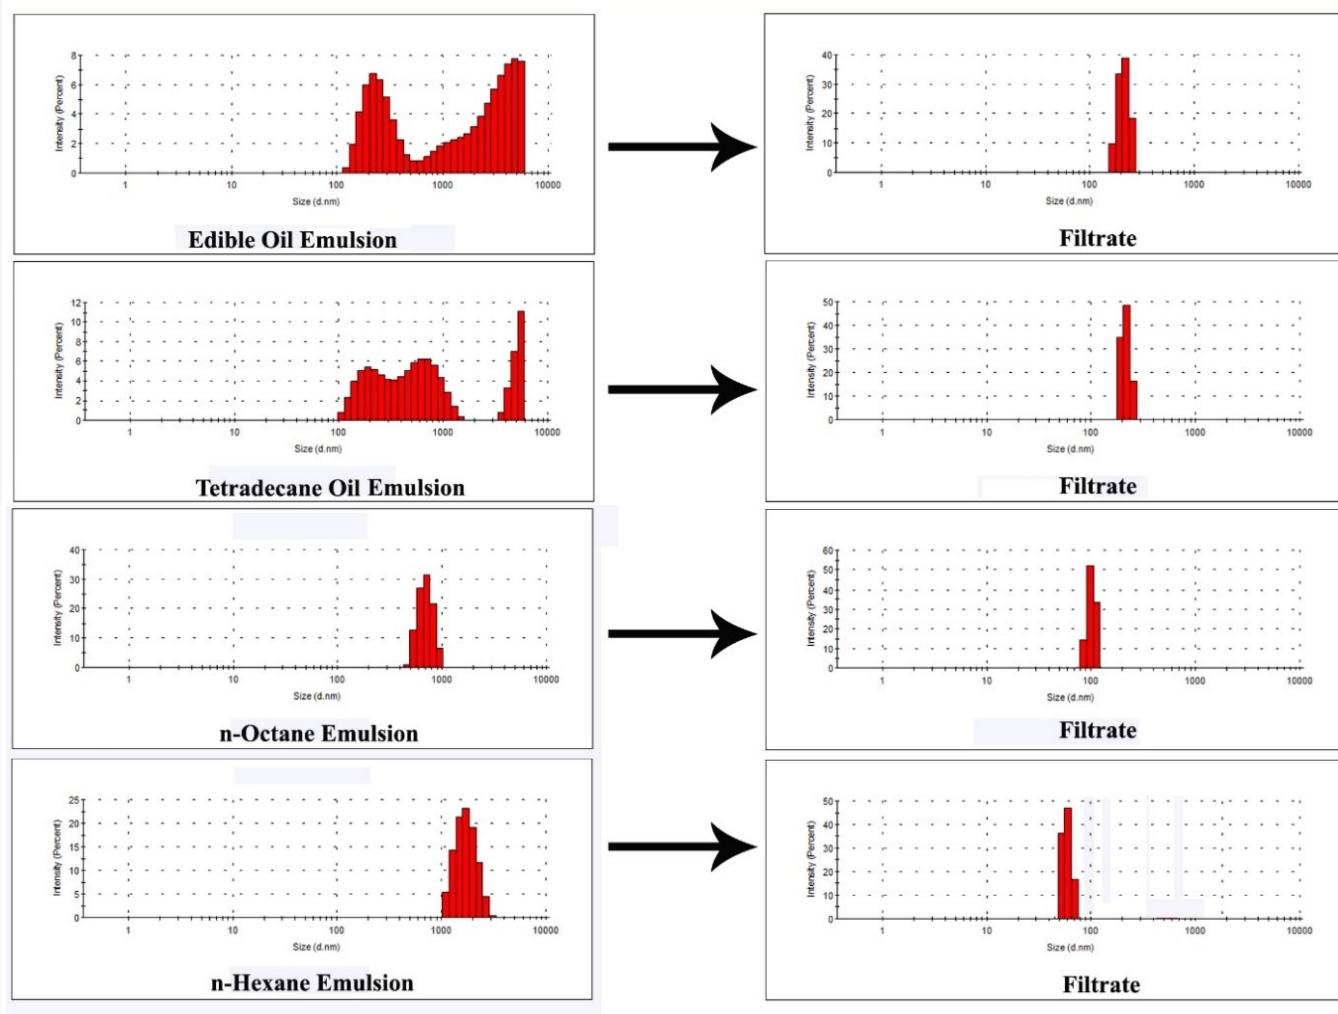

**Figure S12:** DLS results before and after filtration of different oil-water emulsions.
